# Supplementary material for: Dolphin echolocation behaviour during active long-range target approaches
Source: Oxford University Press journal article supplement (doi:10.1242/jeb.189217), 2018-01-01
Supplement: jeb189217supp.pdf [file jeb189217supp.pdf]

## Supplementary material

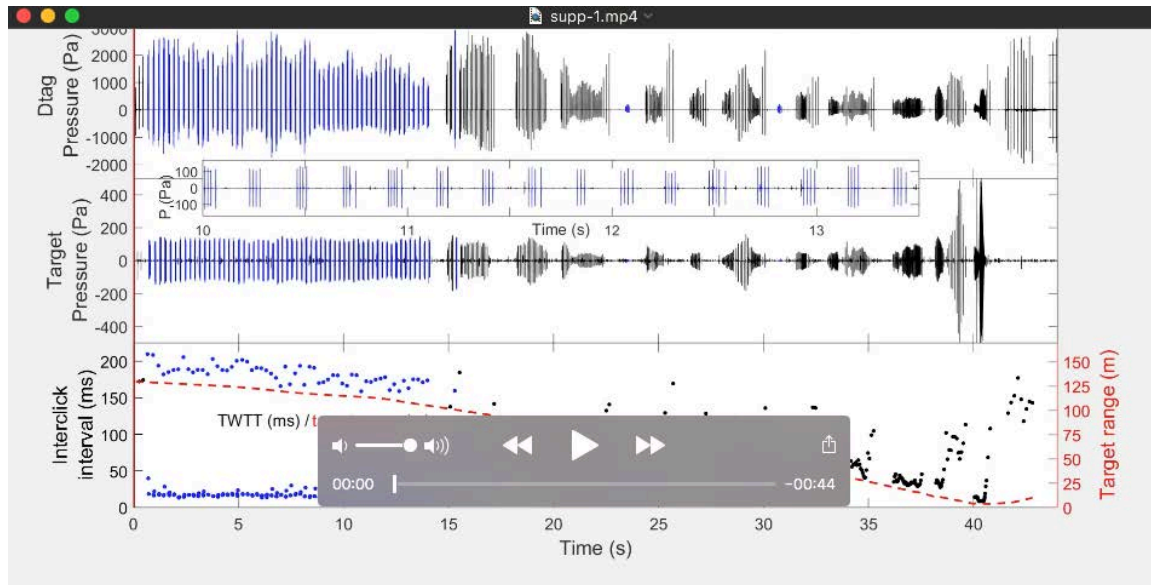

**Movie 1. SAY approach example.** Top panel shows received level measured on the Dtag (~5 cm behind the blowhole). Middle panel shows received level measured by the SoundTrap on the target. The insert between the top and middle panels shows a short section of the received levels on the target to better illustrate the echolocation pattern during click packet emission. Lower panel shows ICI (black dots) along with TWTT (left y-axis) and target range (right y-axis) with the latter two depicted as the same red dashed line. In all three panels, the click packets detected using the automated routine are shown in blue. Note that all IPIs are kept above the TWTT, but that ICIs for regular clicks only consistently exceed the TWTT for target ranges below 33 m. Also, note that the automatic packet detector is not perfect as it fails to detect two packets around 15 s and erroneously detects two short low-amplitude click trains at 23.5 and 30.8 s that do not resemble usual packet ICI patterns.

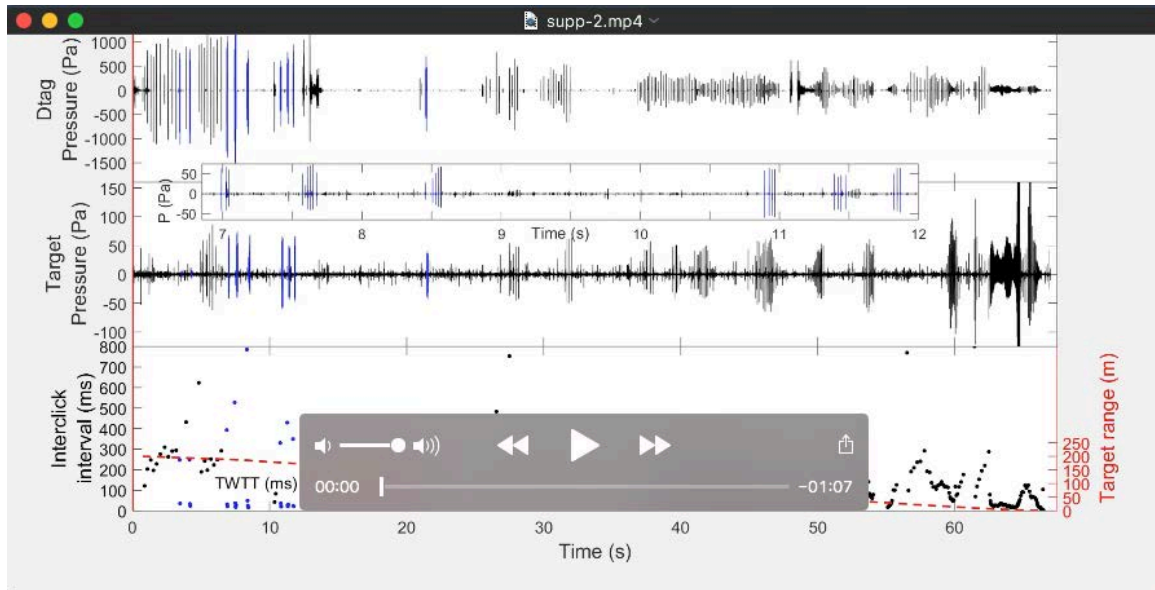

**Movie 2. TRO approach example.** For explanation of layout, see caption for Movie 1. The dolphin surfaces about 13 seconds into the trial with another surfacing at about 48 seconds.

**Table S1.** Echolocation click source parameters estimated from the SoundTrap recordings for clicks where SNR >6 dB, target range >1 m, and ICI >10 ms. Packet clicks have been divided into a group containing only the first click in each packet and a second group containing the remaining packet clicks in order to evaluate the potential effects on SL for long (>150 ms) versus short (10-50 ms) delays before click emission. The source parameters for presumed on-axis clicks are also shown for each dolphin.

| <b>SAY</b>        | <b>All clicks</b>           | <b>All regular clicks</b>       | <b>First packet click</b>           | <b>Last packet clicks</b>           | <b>Units</b>   |
|-------------------|-----------------------------|---------------------------------|-------------------------------------|-------------------------------------|----------------|
| SL <sub>pp</sub>  | 192.5±14.7 [125-225]        | 188.4±12.2 [125-223]            | 208.9±10.6 [157-222]                | 210.2±12.0 [156-225]                | dB re $\mu$ Pa |
| ICI               | 114.0±488.0 [10-22822]      | 108.6±476.3 [10-22822]          | 508.3±1005.6 [152-12984]            | 19.7±7.2 [10-50]                    | ms             |
| F <sub>c</sub>    | 82.3±21.5 [13-160]          | 81.6±22.2 [13-160]              | 82.8±17.9 [26-117]                  | 86.4±18.2 [19-116]                  | kHz            |
| F <sub>p</sub>    | 83.5±38.8 [8-206]           | 81.1±39.8 [8-206]               | 83.9±33.1 [13-148]                  | 91.0±33.4 [13-145]                  | kHz            |
| BW <sub>RMS</sub> | 33.3±6.3 [4-92]             | 33.8±6.6 [4-92]                 | 31.0±4.7 [11-48]                    | 31.8±4.8 [13-53]                    | kHz            |
| SNR               | 22.4±6.7 [6-36]             | 22.1±6.8 [6-36]                 | 24.2±5.9 [6-33]                     | 23.4±6.0 [6-34]                     | dB             |
| Range             | 89.7±82.1 [1-444]           | 69.3±71.1 [1-444]               | 174.0±63.9 [16-438]                 | 179.3±67.4 [15-438]                 | m              |
| N                 | 14383                       | 11687                           | 648                                 | 2048                                |                |
| <b>SAY</b>        | <b>All clicks (on-axis)</b> | <b>Regular clicks (on-axis)</b> | <b>First packet click (on-axis)</b> | <b>Last packet clicks (on-axis)</b> | <b>Units</b>   |
| SL <sub>pp</sub>  | 205.2±10.3 [161-225]        | 200.9±9.4 [161-221]             | 213.6±5.5 [206-221]                 | 214.3±4.7 [201-225]                 | dB re $\mu$ Pa |
| ICI               | 108.8±267.8 [11-3446]       | 145.2±317.2 [11-3008]           | 263.9±92.1 [171-442]                | 19.4±6.0 [11-44]                    | ms             |
| F <sub>c</sub>    | 93.7-13.7 [16-160]          | 94.0±14.7 [16-160]              | 84.4±16.4 [58-109]                  | 93.6±10.8 [60-116]                  | kHz            |
| F <sub>p</sub>    | 102.0±27.5 [11-205]         | 103.0±28.1 [11-205]             | 81.1±34.8 [45-128]                  | 100.9±25.3 [40-143]                 | kHz            |
| BW <sub>RMS</sub> | 32.2±4.0 [11-79]            | 32.3±4.4 [11-79]                | 30.5±4.3 [24-37]                    | 32.0±2.7 [23-40]                    | kHz            |
| SNR               | 25.5±5.9 [6-36]             | 26.2±5.9 [6-36]                 | 20.6±5.7 [12-26]                    | 24.4±5.5 [7-33]                     | dB             |
| Range             | 114.6±91.6 [4-437]          | 81.3±80.9 [4-437]               | 263.2±97.3 [124-349]                | 178.8±67.7 [82-430]                 | m              |
| N                 | 433                         | 292                             | 8                                   | 133                                 |                |
| <b>TRO</b>        | <b>All clicks</b>           | <b>All regular clicks</b>       | <b>First packet click</b>           | <b>Last packet clicks</b>           | <b>Units</b>   |
| SL <sub>pp</sub>  | 183.0±17.8 [132-225]        | 179.4±16.0 [132-225]            | 203.8±10.6 [156-223]                | 206.2±9.7 [166-224]                 | dB re $\mu$ Pa |
| ICI               | 182.9±631.5 [10-17948]      | 181.1±651.0 [10-17948]          | 621.6±790.4 [162-5865]              | 28.4±9.4 [11-50]                    | ms             |
| F <sub>c</sub>    | 58.3±22.4 [14-197]          | 55.9±21.9 [14-197]              | 71.2±19.3 [25-110]                  | 73.8±19.4 [22-116]                  | kHz            |
| F <sub>p</sub>    | 48.9±29.7 [8-203]           | 46.0±28.8 [8-203]               | 64.4±28.3 [14-133]                  | 67.4±30.8 [13-134]                  | kHz            |
| BW <sub>RMS</sub> | 28.6±9.1 [6-86]             | 28.5±9.5 [6-86]                 | 28.8±6.8 [12-44]                    | 29.2±6.5 [11-49]                    | kHz            |
| SNR               | 19.3±6.2 [6-35]             | 19.2±6.3 [6-35]                 | 19.7±6.0 [6-30]                     | 20.0±5.6 [6-30]                     | dB             |
| Range             | 94.2±101.7 [1-401]          | 72.6±89.6 [1-401]               | 220.6±65.8 [14-400]                 | 229.4±62.1 [19-366]                 | m              |
| N                 | 7681                        | 6604                            | 301                                 | 776                                 |                |
| <b>TRO</b>        | <b>All clicks (on-axis)</b> | <b>Regular clicks (on-axis)</b> | <b>First packet click (on-axis)</b> | <b>Last packet clicks (on-axis)</b> | <b>Units</b>   |
| SL <sub>pp</sub>  | 202.3±12.3 [155-225]        | 199.8±12.2 [155-224]            | 213.2±4.0 [205-218]                 | 212.9±3.7 [205-224]                 | dB re $\mu$ Pa |
| ICI               | 144.8±126.4 [12-763]        | 164.8±125.2 [14-763]            | 292.5±82.1 [207-463]                | 27.2±9.1 [12-50]                    | ms             |
| F <sub>c</sub>    | 84.0±15.1 [18-111]          | 82.9±16.0 [18-111]              | 88.7±11.1 [63-98]                   | 88.5±9.6 [68-108]                   | kHz            |
| F <sub>p</sub>    | 83.9±31.0 [10-136]          | 82.1±31.1 [10-136]              | 95.3±22.2 [65-123]                  | 91.3±30.0 [40-134]                  | kHz            |
| BW <sub>RMS</sub> | 32.1±4.7 [11-54]            | 32.1±5.0 [11-54]                | 30.6±2.6 [26-33]                    | 32.1±3.4 [24-39]                    | kHz            |
| SNR               | 24.1±5.4 [6-34]             | 24.5±5.3 [6-34]                 | 25.7±3.8 [19-30]                    | 22.1±5.3 [11-29]                    | dB             |
| Range             | 129.6±102.7 [1-386]         | 110.9±102.8 [1-386]             | 198.6±86.9 [113-342]                | 211.7±43.8 [135-310]                | m              |
| N                 | 355                         | 288                             | 8                                   | 59                                  |                |

**Table S2.** Linear mixed-effects model analysis of the relationship between ICI and target range for the 16 trials in which SAY produced more than 100 clicks at ICI<TWTT at ranges<100 m.

| <b>Model:</b> ICI ~ 1 + <b>range</b> + (1 + range   trial) |                                              |       |             |       |                       |       |       |                |                       |
|------------------------------------------------------------|----------------------------------------------|-------|-------------|-------|-----------------------|-------|-------|----------------|-----------------------|
| <b>Fixed effects coefficients (95% CIs):</b>               |                                              |       |             |       |                       |       |       |                |                       |
| Name                                                       | Estimate                                     | SE    | t-statistic | df    | p-value               | Lower | Upper |                |                       |
| Intercept                                                  | 10.7                                         | 1.96  | 5.47        | 2593  | 5.0*10 <sup>-8</sup>  | 6.87  | 14.6  |                |                       |
| range                                                      | 0.59                                         | 0.035 | 16.9        | 2593  | 1.4*10 <sup>-60</sup> | 0.52  | 0.66  |                |                       |
| <b>Random effects covariance parameters (95% CIs):</b>     |                                              |       |             |       |                       |       |       |                |                       |
| Name1                                                      | Name2                                        | Type  | Estimate    | Lower | Upper                 |       |       |                |                       |
| Intercept                                                  | Intercept                                    | std   | 7.15        | 4.62  | 11.1                  |       |       |                |                       |
| range                                                      | Intercept                                    | corr  | -0.82       | -0.94 | -0.53                 |       |       |                |                       |
| range                                                      | range                                        | std   | 0.13        | 0.084 | 0.20                  |       |       |                |                       |
| <b>Residual errors</b>                                     |                                              |       |             |       |                       |       |       |                |                       |
| Name                                                       | Estimate                                     | Lower | Upper       |       |                       |       |       |                |                       |
| Residual std                                               | 9.62                                         | 9.36  | 9.89        |       |                       |       |       |                |                       |
| Model comparison                                           |                                              |       |             |       | df                    | ΔAIC  | ΔBIC  | χ <sup>2</sup> | p-value               |
| <b>Model 1</b>                                             | ICI ~ 1 + <b>range</b> + (1 + range   trial) |       |             |       | 6                     | 0     | 0     | 46             | 1.1*10 <sup>-11</sup> |
| Null model                                                 | ICI ~ 1 + (1 + range   trial)                |       |             |       | 5                     | 44    | 38    | -              | -                     |

**Table S3.** Generalised linear mixed-effects model analysis of the relationship between number of clicks per packet and target range for two bottlenose dolphins SAY and TRO. Trial was not included as a random effect, because several trials contained very few click packets.

| <b>Model:</b> Clicks per packet ~ 1 + <b>range</b> + (1 + range   dolphin) |                                                              |         |             |     |                       |         |        |                |         |
|----------------------------------------------------------------------------|--------------------------------------------------------------|---------|-------------|-----|-----------------------|---------|--------|----------------|---------|
| <b>Fixed effects coefficients (95% CIs):</b>                               |                                                              |         |             |     |                       |         |        |                |         |
| Name                                                                       | Estimate                                                     | SE      | t-statistic | df  | p-value               | Lower   | Upper  |                |         |
| Intercept                                                                  | 1.07                                                         | 0.13    | 8.16        | 206 | 3.3*10 <sup>-14</sup> | 0.81    | 1.33   |                |         |
| range                                                                      | 0.0017                                                       | 0.00056 | 2.98        | 206 | 0.003                 | 0.00056 | 0.0028 |                |         |
| <b>Random effects covariance parameters (95% CIs):</b>                     |                                                              |         |             |     |                       |         |        |                |         |
| Name1                                                                      | Name2                                                        | Type    | Estimate    |     |                       |         |        |                |         |
| Intercept                                                                  | Intercept                                                    | std     | 0.097       |     |                       |         |        |                |         |
| range                                                                      | Intercept                                                    | corr    | -1          |     |                       |         |        |                |         |
| range                                                                      | range                                                        | std     | 0.00029     |     |                       |         |        |                |         |
| Model comparison                                                           |                                                              |         |             |     | df                    | ΔAIC    | ΔBIC   | χ <sup>2</sup> | p-value |
| <b>Model 1</b>                                                             | Clicks per packet ~ 1 + <b>range</b> + (1 + range   dolphin) |         |             |     | 5                     | 0       | 0      | 4              | 0.047   |
| Null model                                                                 | Clicks per packet ~ 1 + (1 + range   dolphin)                |         |             |     | 4                     | 2       | 1      | -              | -       |

**Table S4.** Linear mixed-effects model analysis of the relationship between SL and  $\log_{10}(R)$ , where R is target range.

| <b>Model:</b> $SL \sim 1 + \log_{10}(R) + \text{packet click} + \text{dolphin} + (1 + \log_{10}(R)   \text{trial})$ |                                                                                                                                  |       |             |       |                         |              |          |                         |
|---------------------------------------------------------------------------------------------------------------------|----------------------------------------------------------------------------------------------------------------------------------|-------|-------------|-------|-------------------------|--------------|----------|-------------------------|
| <b>Fixed effects coefficients (95% CIs):</b>                                                                        |                                                                                                                                  |       |             |       |                         |              |          |                         |
| Name                                                                                                                | Estimate                                                                                                                         | SE    | t-statistic | df    | p-value                 | Lower        | Upper    |                         |
| Intercept                                                                                                           | 172.6                                                                                                                            | 1.42  | 121.8       | 784   | $<2.2 \times 10^{-308}$ | 169.8        | 175.4    |                         |
| dolphin_TRO                                                                                                         | -2.13                                                                                                                            | 0.72  | -2.95       | 784   | 0.0032                  | -3.54        | -0.71    |                         |
| $\log_{10}(R)$                                                                                                      | 16.6                                                                                                                             | 0.79  | 21.0        | 784   | $5.3 \times 10^{-78}$   | 15.0         | 18.1     |                         |
| packet click_1                                                                                                      | 5.86                                                                                                                             | 0.60  | 9.79        | 784   | $1.9 \times 10^{-21}$   | 4.68         | 7.03     |                         |
| <b>Random effects covariance parameters (95% CIs):</b>                                                              |                                                                                                                                  |       |             |       |                         |              |          |                         |
| Name1                                                                                                               | Name2                                                                                                                            | Type  | Estimate    | Lower | Upper                   |              |          |                         |
| Intercept                                                                                                           | Intercept                                                                                                                        | std   | 7.07        | 4.86  | 10.3                    |              |          |                         |
| $\log_{10}(R)$                                                                                                      | Intercept                                                                                                                        | corr  | -0.96       | -0.99 | -0.89                   |              |          |                         |
| $\log_{10}(R)$                                                                                                      | $\log_{10}(R)$                                                                                                                   | std   | 4.05        | 2.76  | 5.96                    |              |          |                         |
| <b>Residual errors</b>                                                                                              |                                                                                                                                  |       |             |       |                         |              |          |                         |
| Name                                                                                                                | Estimate                                                                                                                         | Lower | Upper       |       |                         |              |          |                         |
| Residual std                                                                                                        | 5.92                                                                                                                             | 5.61  | 6.24        |       |                         |              |          |                         |
| Model comparison                                                                                                    |                                                                                                                                  |       |             | df    | $\Delta$ AIC            | $\Delta$ BIC | $\chi^2$ | p-value                 |
| Model 4                                                                                                             | $SL \sim 1 + \log_{10}(R) + \text{packet click} + \text{dolphin} + \log_{10}(R) * \text{dolphin} + (1 + \log(R)   \text{trial})$ |       |             | 9     | 0                       | 0            | 1        | 0.31                    |
| <b>Model 3</b>                                                                                                      | $SL \sim 1 + \log_{10}(R) + \text{packet click} + \text{dolphin} + (1 + \log_{10}(R)   \text{trial})$                            |       |             | 8     | 1                       | 6            | 8        | 0.0050                  |
| Model 2                                                                                                             | $SL \sim 1 + \log_{10}(R) + \text{packet click} + (1 + \log_{10}(R)   \text{trial})$                                             |       |             | 7     | 6                       | 1            | 91       | $<2.2 \times 10^{-308}$ |
| Model 1                                                                                                             | $SL \sim 1 + \log_{10}(R) + (1 + \log_{10}(R)   \text{trial})$                                                                   |       |             | 6     | 89                      | 84           | 145      | $<2.2 \times 10^{-308}$ |
| Null model                                                                                                          | $SL \sim 1 + (1 + \log_{10}(R)   \text{trial})$                                                                                  |       |             | 5     | 143                     | 138          | -        | -                       |

**Table S5.** Linear mixed-effects model analysis of the relationship between SL and ICI.

| <b>Model:</b> $SL \sim 1 + \text{ICI} + \text{packet click} + \text{dolphin} + (1   \text{trial})$ |                                                                                                                                 |       |             |       |                        |              |          |                         |
|----------------------------------------------------------------------------------------------------|---------------------------------------------------------------------------------------------------------------------------------|-------|-------------|-------|------------------------|--------------|----------|-------------------------|
| <b>Fixed effects coefficients (95% CIs):</b>                                                       |                                                                                                                                 |       |             |       |                        |              |          |                         |
| Name                                                                                               | Estimate                                                                                                                        | SE    | t-statistic | df    | p-value                | Lower        | Upper    |                         |
| Intercept                                                                                          | 189.0                                                                                                                           | 1.77  | 107         | 317   | $2.2 \times 10^{-250}$ | 185.5        | 192.5    |                         |
| dolphin_TRO                                                                                        | -4.89                                                                                                                           | 1.12  | -4.4        | 317   | $1.8 \times 10^{-5}$   | -7.09        | -2.68    |                         |
| ICI                                                                                                | 0.133                                                                                                                           | 0.050 | 2.7         | 317   | 0.0079                 | 0.0351       | 0.231    |                         |
| packet click_1                                                                                     | 23.1                                                                                                                            | 1.05  | 22          | 317   | $9.0 \times 10^{-66}$  | 21.0         | 25.2     |                         |
| <b>Random effects covariance parameters (95% CIs):</b>                                             |                                                                                                                                 |       |             |       |                        |              |          |                         |
| Name1                                                                                              | Name2                                                                                                                           | Type  | Estimate    | Lower | Upper                  |              |          |                         |
| Intercept                                                                                          | Intercept                                                                                                                       | std   | 1.84        | 0.333 | 10.1                   |              |          |                         |
| <b>Residual errors</b>                                                                             |                                                                                                                                 |       |             |       |                        |              |          |                         |
| Name                                                                                               | Estimate                                                                                                                        | Lower | Upper       |       |                        |              |          |                         |
| Residual std                                                                                       | 7.61                                                                                                                            | 6.87  | 8.43        |       |                        |              |          |                         |
| Model comparison                                                                                   |                                                                                                                                 |       |             | df    | $\Delta$ AIC           | $\Delta$ BIC | $\chi^2$ | p-value                 |
| Model 5                                                                                            | $SL \sim 1 + \text{ICI} + \text{packet click} + \text{dolphin} + \text{ICI} * \text{dolphin} + (1 + \text{ICI}   \text{trial})$ |       |             | 9     | 0                      | 0            | 0.1      | 0.73                    |
| Model 4                                                                                            | $SL \sim 1 + \text{ICI} + \text{packet click} + \text{dolphin} + (1 + \text{ICI}   \text{trial})$                               |       |             | 8     | 2                      | 6            | 0.5      | 0.78                    |
| <b>Model 3</b>                                                                                     | $SL \sim 1 + \text{ICI} + \text{packet click} + \text{dolphin} + (1   \text{trial})$                                            |       |             | 6     | 4                      | 11           | 13       | $2.6 \times 10^{-4}$    |
| Model 2                                                                                            | $SL \sim 1 + \text{ICI} + \text{packet click} + (1   \text{trial})$                                                             |       |             | 5     | 11                     | 8            | 271      | $<2.2 \times 10^{-308}$ |
| Model 1                                                                                            | $SL \sim 1 + \text{ICI} + (1   \text{trial})$                                                                                   |       |             | 4     | 267                    | 265          | 37       | $1.0 \times 10^{-9}$    |
| Null model                                                                                         | $SL \sim 1 + (1   \text{trial})$                                                                                                |       |             | 3     | 143                    | 138          | -        | -                       |

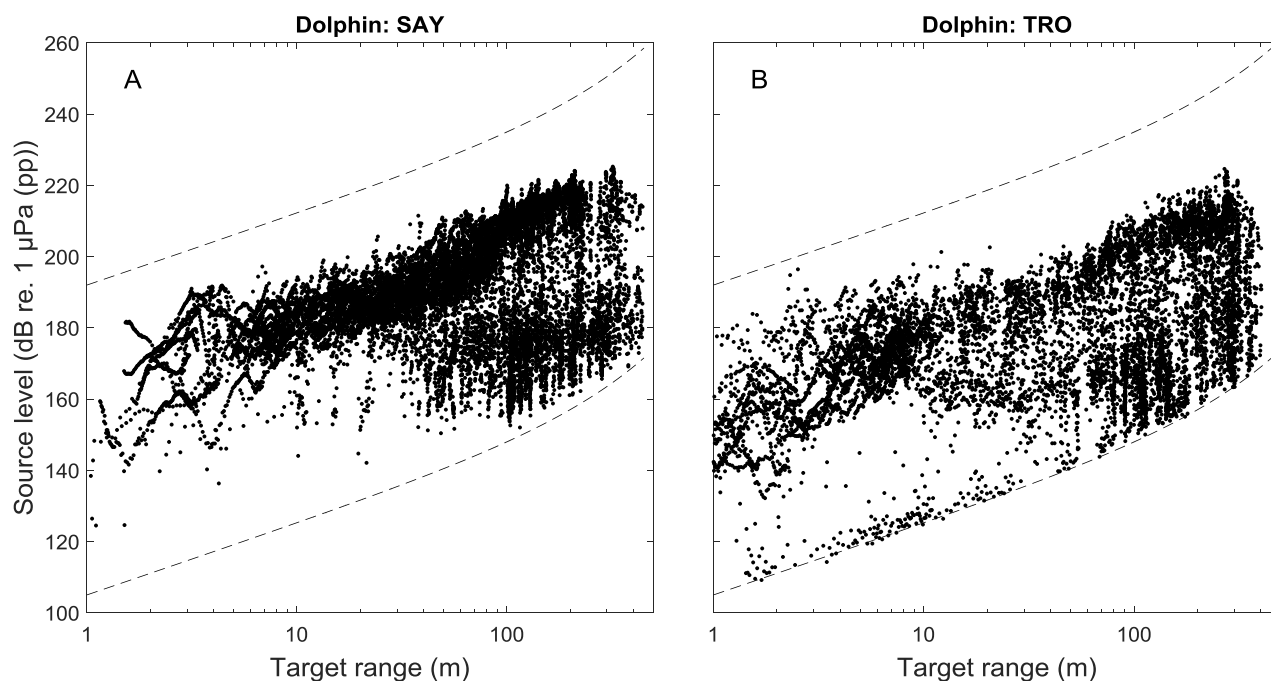

**Figure S1. SL as a function of target range for the 16,284 and 9,739 total click detections in the SoundTrap recordings for the two bottlenose dolphins SAY (A) and TRO (B).** The clipping level (pp, i.e.  $186+6$  dB re.  $1 \mu\text{Pa}$  (pp)) plus estimated transmission loss ( $20\log_{10}(R)+0.03R+192$  dB re.  $1 \mu\text{Pa}$  (pp)) is shown as the upper dashed line. Because click detection in the SoundTrap recordings involved manual inspection, the plotted detection threshold (lower dashed line,  $20\log_{10}(R)+0.03R+105$  dB re.  $1 \mu\text{Pa}$  (pp)) is only an approximation based on the lower boundary of the two SL distributions. The absorption loss coefficient of  $0.03$  dB/m is estimated using a frequency of  $80$  kHz,  $15^\circ\text{C}$  water temperature,  $0$  km depth,  $35$  ppm salinity, and a pH of  $8$  following Ainslie and McColm (1998). This figure shows that clicks were likely to be detected in the SoundTrap recordings if SLs exceeded  $169$  dB re.  $1 \mu\text{Pa}$  (pp) at  $400$  m target range.

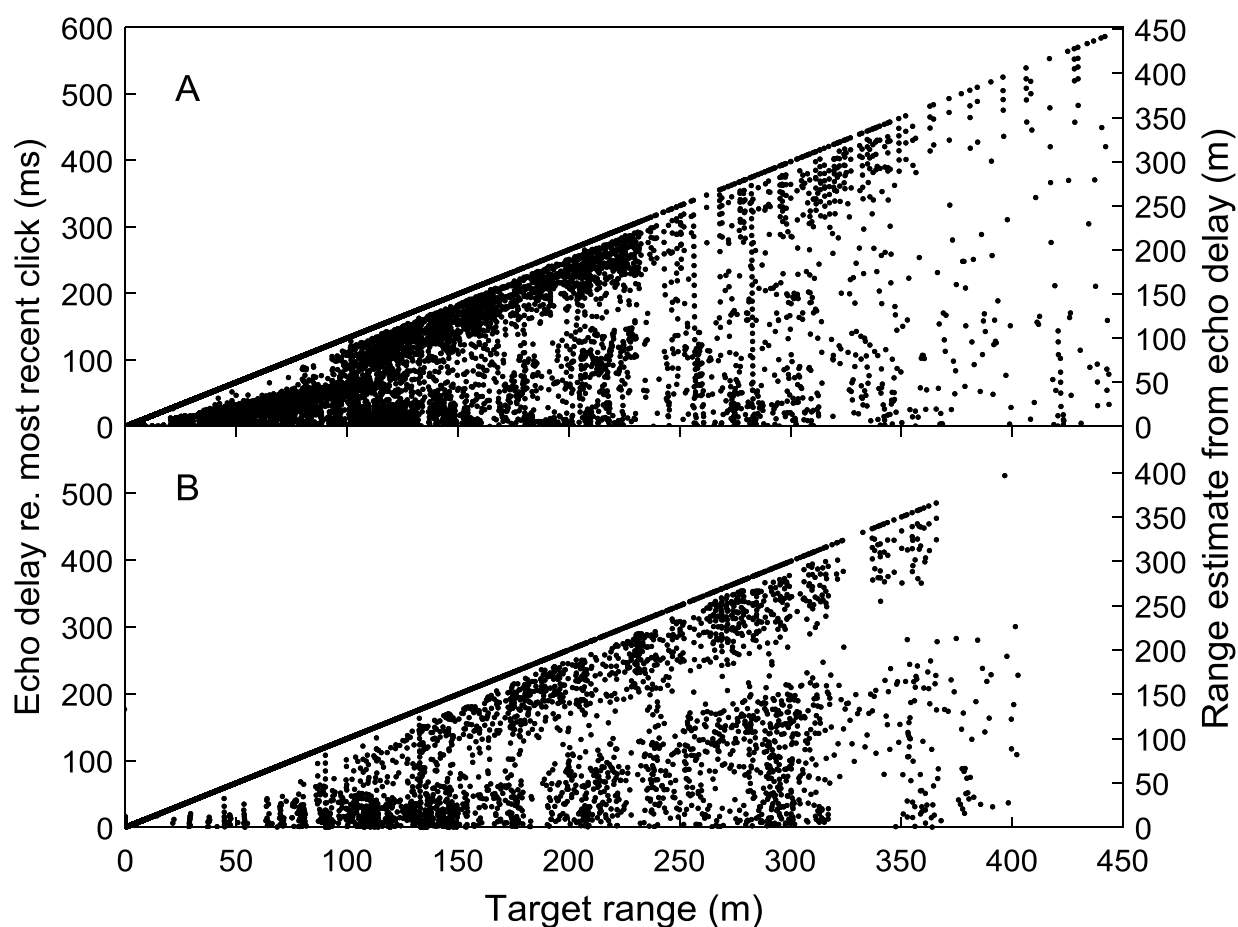

**Figure S2.** Echo delays measured between estimated target echo return times and the most recent click event as a function of target range for all click detections made on the target-mounted SoundTrap for the two bottlenose dolphins SAY (A, 16,284 clicks) and TRO (B, 9739 clicks). When ICIs are longer than the TWTT to the target and back, the target range is estimated correctly, whereas ICIs shorter than the TWTT result in underestimated target ranges. The number of correct target range estimates using this method is 8,311 for SAY and 3,146 for TRO. Note that the correct estimates separate out above the underestimates by a gap of ~10 m or more due to the dolphins generally clicking at ICIs longer than ~13 ms.
